# Supplementary material
Source: PubMed Central journal article supplement (PMC2768566)
Supplement: NIHMS103178-supplement-1.pdf [file NIHMS103178-supplement-1.pdf]

Mitsuyasu A42423A

### SPECIAL CONSIDERATIONS

- ✓ The main text should be no more than 3,000 words and contain no more than 6 display items.
- ✓ Give the final word count 2798 and display-item count 6.
- ✓ Please see the marked copies of your figures for specific style changes we would like you to make.
- ✓ Ensure that all figures have error bars, as applicable.
- ✓ Ensure that all figures have scale bars (rather than numerical descriptions of magnification), as applicable.
- ✓ Every coauthor should check the author list for order, completeness, the spelling of his or her name and the numbering of affiliations, and must provide a full mailing address, with street address and postal code, for each affiliation.
- ✓ Please submit supplementary files exactly as you wish them to appear online; *i.e.*, integrate figure legends into the same file as images. No more than eight supplementary items in total.
- ✓ Please use the active voice as much as possible, particularly in the Methods section. For example, use (i) rather than (ii):
  - (i) We obtained 5–30 ml of peripheral blood from each family member.
  - (ii) 5–30 ml of peripheral blood were obtained from each family member.
- ✓ Please express “per” units as “unit<sup>-1</sup>” (*e.g.* “ng μl<sup>-1</sup>”, not “ng/μl” or “ng per μl”).

### POLICY

- ✓ Ensure that all gene symbols used have been recognized by the appropriate nomenclature committee: for humans, the HUGO Gene Nomenclature Committee (<http://www.gene.ucl.ac.uk/nomenclature/>); for mice, the Mouse Genome Database (<http://www.informatics.jax.org/>).
- ✓ Include statements giving the full name of the committee approving animal or human experiments and confirming that informed consent was obtained from human subjects.
- ✓ Please complete, sign and return a **Competing Financial Interests** form. If declaring any competing financial interests, please provide a list of competing interests as a Word document.
- ✓ Please confirm that the paper complies with Nature Publishing policy concerning image integrity (see [http://www.nature.com/authors/editorial\\_policies/image.html](http://www.nature.com/authors/editorial_policies/image.html)).

### GENERAL STYLE AND FORMAT

#### Text

- ✓ All figures and tables, including Supplementary items, must be cited in the text in numerical order.
- ✓ In the text, refer to figures, tables and supplementary information as follows: **(Fig. 3a)**, **(Fig. 2a,b)**, **(Figs. 1 and 2)**, **(Table 1)**, **(Supplementary Methods online)** etc. Note the use of lowercase letters for panels of figures. Parentheses should NOT be boldface. For ranges (*e.g.* **(Fig. 2a–c)**), use ‘en dashes’, not hyphens. Pressing the ‘Control’ key (on a PC) or the ‘Option’ key (on a Mac) and the minus key on the number keypad will insert an en dash.

#### Nomenclature

Please pay careful attention to our policy for referring to genes, genotypes and mutants, in text and figures:

- ✓ Be careful to clearly distinguish between protein and gene in referring to symbols or names.
- ✓ Be sure that all gene and functionally defined locus symbols are italicized in text and figures whereas protein products and gene names are in roman (upright) type.
- ✓ Italicization and capitalization of human and mouse genes are as follows:
  - Human gene: *ABC*
  - Human protein: ABC
  - Mouse gene: *Abc*
  - Mouse protein: Abc

#### Style and Usage

- ✓ Numbers from one to ten should be spelled out unless followed by unit of measure (ml, min, weeks etc.), in which case always use a numeral. Use commas in numbers with more than three digits (2,000 and 2,000,000), including axis labels.

- ✓ Standard abbreviations: s, min, h, d, kDa (for seconds, minutes, hours, days, kilodaltons). Use throughout the text, including Methods, figure legends and figures themselves.
- ✓ For a minus sign, use an 'en-dash' (–), not a hyphen (-): Control key (PC) or Option (Mac) and keypad-minus. Examples: *Ipf1*<sup>+/–</sup> mouse; –80 °C. Also use in number ranges: 5–10 weeks old.
- ✓ Make sure all Greek letters and mathematical symbols (°, × (for scientific notation and magnification), ±, ') are in Symbol font. If using Microsoft Word, use Insert > Symbol to ensure the symbols are not lost in typesetting. Note that the ± and ≥ signs are found in the Symbol font and are not simply + and > underlined.
- ✓ Use a space between numbers and their associated units, except for the % sign (5 ml, 4 °C, 10%)
- ✓ Italicize *in vitro*, *in vivo*, *et al.*, variables such as *M<sub>n</sub>*, *P* (*P* < 0.05) and *n* (*n* = 5), genus/species names, and restriction enzymes (*EcoRI*).
- ✓ Use hyphens between a protein name and the associated Greek symbol (TNF-α; IFN-γ).
- ✓ In phenotypes, + and – signs should be superscript (for example, CD4<sup>+</sup>CD8<sup>–</sup>), and there should be no spaces. Please do not substitute CD4+, CD4(+), CD4, CD4<sup>+</sup>/CD8<sup>–</sup>, etc.
- ✓ Use of the word 'significant' when describing results must be accompanied by a *P* value. If not
- ✓ Avoid use of the slash (/) as it can be ambiguous—use 'and' or 'or' instead. Avoid 'and/or.'
- ✓ All abbreviations (including gene, protein and genus names) must be spelled out at first mention.
- ✓ Do not use an abbreviation unless it appears three or more times in the text. Avoid two-letter abbreviations in the text (OK in display items where space is tight).

## PARTS OF THE MANUSCRIPT

### Title

Keep title short and concise (<100 characters, including spaces)

### Subheadings

Results subheads should be <60 characters, including spaces, with only the first letter capitalized. Each subheading must refer to at least two paragraphs.

### Methods

Include manufacturer names for products (in Methods, not in main text).  
 Do not include locations of manufacturers.  
 Include short subheads for each section ('Immunofluorescence,' 'Cell culture'). Subhead is on the same line as the first line of the paragraph.  
 Oligonucleotide sequences are written as 5'-GATCGACT-3'.

### Acknowledgments

Check for accuracy, including completeness of the list of individuals acknowledged, and accuracy and completeness of grant numbers and funding sources.  
 Refer to individuals by first initial and last name, without titles or affiliations (e.g., J. Bloggs, not Dr. Joe Bloggs). Exception: provide affiliations for those who have supplied materials (cell lines, antibodies, etc.). This information should be stated in the Acknowledgments, not in the Methods or main text.  
 Write out all acronyms. Give country name when using 'National' (e.g., US National Institutes of Health).

### Author Contributions

We encourage you to provide a brief statement after the Acknowledgements specifying the individual contributions of each coauthor to this work. (An example: "A.M. conducted the xxx experiments and wrote the manuscript; B.v.R. prepared the mutant proteins and contributed to the *in vitro* studies; C.-S.Q. conducted the data analyses; L.J.A. supervised the project..." etc.)

### References

Examples of references are as follows. Use *et al.* when six or more authors are involved. Use journal abbreviations as found in PubMed.

1. Dent, A.L., Shaffer, A.L., Yu, X., Allman, D. & Staudt, L.M. Control of inflammation, cytokine expression, and germinal center formation by BCL-6. *Science* **276**, 589–592 (1997).
2. Borowski, C. *et al.* On the brink of becoming a T cell. *Curr. Opin. Immunol.* **14**, 200–206 (2002).
3. Lensch, M.W. *et al.* Acquired FANCA dysfunction and cytogenetic instability in adult acute myelogenous leukemia. *Blood* (in the press).
4. Author, A. Chapter title. in *Book Title* (ed. Editor, E.) 123–456 (Publishing Company, City, Year). [Note page numbers.]

### Figure Legends

- ✓ Please aim to make all figure legends as concise as possible (<250 words), describing only what is in the figure itself. Please restrict interpretations of data and methodological details to the Results and Methods sections, respectively.
- ✓ Refer to figure panels in lower-case, bold type in the figure legend: for example, “(a) Alignment of torsins and torps”. Parentheses should not be bold.

### Tables

- ✓ All tables must be provided in editable text format; tables provided as separate graphic files or as graphics embedded in the manuscript file cannot be accepted.
- ✓ Each table should be announced by a brief title, which should appear at its head.
- ✓ Use superscripted lowercase letters, rather than symbols, to link items to footnotes.

### Figures—IMPORTANT! (Failure to follow NM figure style may delay publication)

- ✓ Check that images are not inadvertently repeated. Look carefully at images.
- ✓ When filling bars in bar graphs, use (in order of preference) black, light gray, dark gray and white. Do not use patterns such as hatching, dots or stripes.
- ✓ In labels, capitalize first letter of first word only (as in a sentence); this includes all axis labels, keys in graphs, etc.
- ✓ When labeling figures, use a *sans serif* font such as Fruitiger or Helvetica, and use the Symbol font (if available) for Greek characters.
- ✓ Include a space between numbers and their associated units, and spaces around  $\pm$ ,  $\geq$ ,  $\leq$ ,  $<$ ,  $>$  and = signs in equations and inequalities (but not otherwise: e.g., ‘a temperature  $>20$  °C’).
- ✓ If size and readability allow, include symbol key within the figure itself. If not possible to fit the key into the figure, include symbols in the legend (describe the symbols in words (‘filled circle’) rather than trying to find symbols to match).
- ✓ Use basic shapes for symbols (circle, square, diamond, triangle); avoid symbols like  $\times$  or squares with lines through them, etc.
- ✓ The final dimensions of the printed page are 170 mm  $\times$  240 mm. Most figures are sized to  $\frac{1}{4}$  of that, or 85 mm  $\times$  120 mm.
- ✓ Preference for panel layout is a,b above and c,d below.
- ✓ DON’T:
  - Use boxes or borders around figures or keys
  - Use boldface, italic, or all-capital labels (e.g. for emphasis), except as specified

### Supplementary Information

- ✓ Each piece of supplementary information must be given a unique name and be cited by name, in order in the text.
- ✓ Provide a tabular list (electronic copy), named ‘SI Guide’, of all supplementary items and provide a brief, specific title for each supplementary table, figure, video or audio. Please use the ‘Supplementary Information Titles’ template at the end of this document; you may fill the table in and submit as a separate Word document or include the table at the end of your main manuscript text document.
- ✓ Please submit supplementary figures, tables and text as PDFs, and preferably as one combined PDF (with the pieces in the order figures, tables, text). Include the legend on the same page as each supplementary figure.

✓  
Please list the title and authors of your paper at the top of the first piece of Supplementary Information.

✓  
Personal or outside websites should not be called 'Supplementary Information'; this term refers only to supplementary items posted on Nature Medicine website.

## Supplementary Information Titles

*Please list each supplementary item and its title or caption, in the order shown below.*

**Note that we do NOT copy edit or otherwise change supplementary information, and minor (nonfactual) errors in these documents cannot be corrected after publication.**

Please submit document(s) exactly as you want them to appear, with all text, images, legends and references in the desired order, and check carefully for errors.

|                                 |
|---------------------------------|
| <b>Journal:</b> Nature Medicine |
|---------------------------------|

|                              |                                                                                                                     |
|------------------------------|---------------------------------------------------------------------------------------------------------------------|
| <b>Article Title:</b>        | <i>Safety and Efficacy of Autologous CD34+ Hematopoietic Progenitor Cells transduced with anti-Tat Ribozyme ...</i> |
| <b>Corresponding Author:</b> | <i>Ronald Mitsuyasu</i>                                                                                             |

| <b>Supplementary Item &amp; Number</b><br>(add rows as necessary) | <b>Title or Caption</b>                                                   |
|-------------------------------------------------------------------|---------------------------------------------------------------------------|
| Supplementary Figure 1                                            | All in 1 PDF file entitled:<br><i>Supplementary Materials.</i>            |
| Supplementary Table 1                                             | [TITLE OF TABLE (descriptive title)]                                      |
| Supplementary Methods (or Discussion or Data or Note)             | [NO DESCRIPTIVE TITLE NECESSARY]                                          |
| Supplementary Video 1 (or Audio or Spreadsheet)                   | [CAPTION TO BE POSTED ONLINE (include title and explanation of contents)] |
